# Supplementary material
Source: PubMed Central journal article supplement (PMC6679829)
Supplement: NIHMS1011157-supplement-Supp_info.pdf [file NIHMS1011157-supplement-Supp_info.pdf]

# Supplemental Information

## Deciphering the essentiality and function of the anti- $\sigma^M$ factors in *Bacillus subtilis*

**Heng Zhao, Daniel M. Roistacher, and John D. Helmann\***

Cornell University, Department of Microbiology, Ithaca, NY, USA 14853-8101

\*Corresponding author:

John D. Helmann

Department of Microbiology, Wing Hall,  
Cornell University, Ithaca, NY 14853-8101.

Email: [jdh9@cornell.edu](mailto:jdh9@cornell.edu)

Phone: (607) 255-6570; Fax: (607) 255-3904

Co-author emails: [hz285@cornell.edu](mailto:h285@cornell.edu), [dmr293@cornell.edu](mailto:dmr293@cornell.edu)

**Table S1. Primers and gBlock used in this study**

| Number | Name                   | Sequence                                                                                                                                                                                                                                                                                                                                                                                                                                                                                                                       |
|--------|------------------------|--------------------------------------------------------------------------------------------------------------------------------------------------------------------------------------------------------------------------------------------------------------------------------------------------------------------------------------------------------------------------------------------------------------------------------------------------------------------------------------------------------------------------------|
| 6578   | xyIR-F-BamHI           | ATCGGGATCCCCGGTGGATAAACAAAGGAGTGG                                                                                                                                                                                                                                                                                                                                                                                                                                                                                              |
| 6579   | xyIR-R-NotI            | ATCGCGCGCCCGGGAGCTCCTAACTTATAGGGGT                                                                                                                                                                                                                                                                                                                                                                                                                                                                                             |
| 6580   | sigM-F-NotI            | ATCGCGCGCCCGCCTATCTTTTGGCGCCAT                                                                                                                                                                                                                                                                                                                                                                                                                                                                                                 |
| 6581   | sigM-R-HindIII         | ATCGAAGCTTTGGTGCCTCATTTCGCCATT                                                                                                                                                                                                                                                                                                                                                                                                                                                                                                 |
| 6582   | yhdL-cln-up-F          | GCCGTTTTTCGTGCGAGAAT                                                                                                                                                                                                                                                                                                                                                                                                                                                                                                           |
| 6583   | yhdL-cln-up-R          | CGCCGACATTGCTGATTTTTCTGGTTCGCTCATTTC                                                                                                                                                                                                                                                                                                                                                                                                                                                                                           |
| 6584   | yhdL-cln-mid-F         | GGGAAATGAGCGACCAGGAAAATCAGCGAATGTCGGCG                                                                                                                                                                                                                                                                                                                                                                                                                                                                                         |
| 6585   | yhdL-cln-mid-R         | CCTATCACCTCAAATGGTTCGCTGCCGAAAACCGGTATAACGAAA                                                                                                                                                                                                                                                                                                                                                                                                                                                                                  |
| 6586   | yhdL-cln-down-F        | CGAGCGCCTACGAGGAAATTTGTATCGAGATACGAAATTTACAGTTTGGCT                                                                                                                                                                                                                                                                                                                                                                                                                                                                            |
| 6587   | yhdL-cln-down-R        | ACGAATCGGGCAATCATGTG                                                                                                                                                                                                                                                                                                                                                                                                                                                                                                           |
| 6588   | chr-sigM-seq-F         | CCATTGTGCCACTCCTTCAC                                                                                                                                                                                                                                                                                                                                                                                                                                                                                                           |
| 6589   | chr-sigM-seq-R         | TGCAGTCATTTCTGGTTCGC                                                                                                                                                                                                                                                                                                                                                                                                                                                                                                           |
| 6590   | pAX01-check-F          | GGGGGAAATGACAAATGGTCC                                                                                                                                                                                                                                                                                                                                                                                                                                                                                                          |
| 6591   | pAX01-check-R          | ACGAAAGGGCCTCGTGATAC                                                                                                                                                                                                                                                                                                                                                                                                                                                                                                           |
| 6599   | Pxyl-yhdL-F-BamHI      | ATCGGGATCCTAGAGGGGAGAAAAGGCAATGATGAATGAAGAAATTTAAAAAGC                                                                                                                                                                                                                                                                                                                                                                                                                                                                         |
| 6600   | Pxyl-yhdL-R-SacII      | ATCGCCGCGGTCCAGCCGAATACATTGTG                                                                                                                                                                                                                                                                                                                                                                                                                                                                                                  |
| 6693   | pAX01-erm-cm-up-F      | GCCGCACTCTTCTTTTTCAA                                                                                                                                                                                                                                                                                                                                                                                                                                                                                                           |
| 6694   | pAX01-erm-cm-up-R      | CTTGATAATAAGGGTAACATAATTCCTTTGGTTGAGTACTTTTTCACTCG                                                                                                                                                                                                                                                                                                                                                                                                                                                                             |
| 6695   | pAX01-erm-cm-down-F    | GGGTAACTAGCCTCGCCGGTCCACGCTGGGGGAGGAAATAATCTATGAGTCCG                                                                                                                                                                                                                                                                                                                                                                                                                                                                          |
| 6696   | pAX01-erm-cm-down-R    | TCCGCATTTTTGCATGGAGC                                                                                                                                                                                                                                                                                                                                                                                                                                                                                                           |
| 6759   | yhdL-check-F           | ACGCTGGGAAAGCTACCTCTA                                                                                                                                                                                                                                                                                                                                                                                                                                                                                                          |
| 6760   | yhdL-check-R           | TCTGCTTTTGCAGTCTGTTG                                                                                                                                                                                                                                                                                                                                                                                                                                                                                                           |
| 6808   | PsigM-F-EcoRI          | AGCTGAATTCGCCGTTTGCATGTAATGTG                                                                                                                                                                                                                                                                                                                                                                                                                                                                                                  |
| 6809   | PsigM-R-PstI           | AGCTCTGCAGCAGTAAGTCTTCAGCAAGATGC                                                                                                                                                                                                                                                                                                                                                                                                                                                                                               |
| 6814   | pBs1ClacZ(lux)-check-F | AAAGGATTTGAGCGTAGCGA                                                                                                                                                                                                                                                                                                                                                                                                                                                                                                           |
| 6815   | pBs1ClacZ-check-R      | TTGGGTAACGCCAGGGTTTT                                                                                                                                                                                                                                                                                                                                                                                                                                                                                                           |
| 6816   | pBs3Clux-check-R       | GAGAGTCTCTGTCGACCT                                                                                                                                                                                                                                                                                                                                                                                                                                                                                                             |
| 7249   | yhdL-in-check-F        | GAAAACACAGCACCGGCAAT                                                                                                                                                                                                                                                                                                                                                                                                                                                                                                           |
| 7250   | yhdL-in-check-R        | AATTCACCTCGCCGACATT                                                                                                                                                                                                                                                                                                                                                                                                                                                                                                            |
| 7324   | rpoB-gRNA-F            | TACGGACTGTTAAGTCTGATGACG                                                                                                                                                                                                                                                                                                                                                                                                                                                                                                       |
| 7325   | rpoB-gRNA-R            | AAACCGTCATCAGACTTAACAGTC                                                                                                                                                                                                                                                                                                                                                                                                                                                                                                       |
| 7326   | rpoB-repair-up-F       | AAGGCCAACGAGCCTCGCCTTCGCAATCTTGATG                                                                                                                                                                                                                                                                                                                                                                                                                                                                                             |
| 7327   | rpoB-repair-up-R       | CTTGATGTTTTACACGCTCCAACAACATCATTAGACTTAACAGTCAGAAATTTCTGA                                                                                                                                                                                                                                                                                                                                                                                                                                                                      |
| 7328   | rpoB-repair-down-F     | TCAAAGAAATTCGACTGTAAAGTCTAATGATGTTGTTGGACGTGTGAAAACATACGAAAG                                                                                                                                                                                                                                                                                                                                                                                                                                                                   |
| 7329   | rpoB-repair-down-R     | AAGGCCATTTAGCCCTACGGCGTTGTCTTGTGAA                                                                                                                                                                                                                                                                                                                                                                                                                                                                                             |
| 7340   | rpoC10034-gRNA-F       | TACGGGTAACGCTGTCGTAATCT                                                                                                                                                                                                                                                                                                                                                                                                                                                                                                        |
| 7341   | rpoC10034-gRNA-R       | AAACGAGTAATCGACAGCTTACC                                                                                                                                                                                                                                                                                                                                                                                                                                                                                                        |
| 7344   | rpoC1004-repair-up-R   | CAACAACGATTACAGAAGCTCCTGAATAGTCCACATGTTACCAAGAAGGTTTTGACGGA                                                                                                                                                                                                                                                                                                                                                                                                                                                                    |
| 7345   | rpoC1004-repair-down-F | TCCGTCAAAACCTTCTTGGTAAACATGTGGACTATTCAGGACGTTCTGTAATCGTTGTTG                                                                                                                                                                                                                                                                                                                                                                                                                                                                   |
| 7348   | pJOE8999-check-F       | CCTTTTTGCGTGTGATGCGA                                                                                                                                                                                                                                                                                                                                                                                                                                                                                                           |
| 7349   | pJOE8999-check-R       | GTCAGCTAGGAGGTGACTGA                                                                                                                                                                                                                                                                                                                                                                                                                                                                                                           |
| 7405   | SigA-R-SacII           | ATCGCCGCGGACAAAATTTGAATAGAAACATGCCT                                                                                                                                                                                                                                                                                                                                                                                                                                                                                            |
| 7406   | SigA-F-SpeI            | ATCGACTAGTTTGGCGAGGAGCAATAGAT                                                                                                                                                                                                                                                                                                                                                                                                                                                                                                  |
| 7625   | NFLAG-YhdK-Up-F        | AAGGCCAACGAGGCGGGAAATGAGCGACCAGGAA                                                                                                                                                                                                                                                                                                                                                                                                                                                                                             |
| 7628   | NFLAG-YhdK-Down-R      | AAGGCCTATTGGCCGACATCGAGCAAGCTGGAGA                                                                                                                                                                                                                                                                                                                                                                                                                                                                                             |
| 7635   | N-FLAG-YhdK-gRNA-F     | TACGGCGAGGTGGAATTAAGGAAAC                                                                                                                                                                                                                                                                                                                                                                                                                                                                                                      |
| 7636   | N-FLAG-YhdK-gRNA-R     | AAACGTTCCATAATTCACCTCCG                                                                                                                                                                                                                                                                                                                                                                                                                                                                                                        |
| 7656   | PfosB-XbaI-F           | CTAGACTGTATGAAACTTTCTTATGAAAAAAGTCGTATATGTTGGATGATCAGCTTCTGCA                                                                                                                                                                                                                                                                                                                                                                                                                                                                  |
| 7657   | PfosB-PstI-R           | GAACTGATCATCCACATATACGACTTTTTTATAAGAAAGTTTCATACAGT                                                                                                                                                                                                                                                                                                                                                                                                                                                                             |
| 7738   | gBLOCK-CL-NK-up-R      | TTGGCCCTGTAAACGACCGAAACCGTATACCTTTGACACCGTTTTTCTCTACA                                                                                                                                                                                                                                                                                                                                                                                                                                                                          |
| 7739   | gBLOCK-CL-NK-down-F    | TTGCCATGGCTGCCGTTCCGTTCCGGCGTTGTTGAACTCTT                                                                                                                                                                                                                                                                                                                                                                                                                                                                                      |
| 7545   | PsigW-XbaI-F           | ATCGCTAGAACTTTGACTCCGTCATCGCT                                                                                                                                                                                                                                                                                                                                                                                                                                                                                                  |
| 7827   | sigM-int-F             | CCGCTGTCTGGCAGGAAATA                                                                                                                                                                                                                                                                                                                                                                                                                                                                                                           |
| 7828   | sigM-int-R             | TTTTCAAGTGGCGCGAAACG                                                                                                                                                                                                                                                                                                                                                                                                                                                                                                           |
| 8110   | PspoIIM-XbaI-F         | ATCGCTAGACATACAGCAGTTGATGATAAGG                                                                                                                                                                                                                                                                                                                                                                                                                                                                                                |
| 8111   | PspoIIM-PstI-R         | ATCGCTGACGCGCTCTAGTGTATTTGATTTAATA                                                                                                                                                                                                                                                                                                                                                                                                                                                                                             |
| 8112   | PspoVFA-XbaI-F         | ATCGCTAGAGCGGGCTCTAAGAAAAACAT                                                                                                                                                                                                                                                                                                                                                                                                                                                                                                  |
| 8113   | PspoVFA-PstI-R         | ATCGCTGACGCTGGATCTCTAGTTGTTAAGC                                                                                                                                                                                                                                                                                                                                                                                                                                                                                                |
| 8114   | sigH-check-F           | ATTTTCGGACAGGGGGCATT                                                                                                                                                                                                                                                                                                                                                                                                                                                                                                           |
| 8115   | sigH-check-R           | GGTTTCCGCATGTCTTGCAAT                                                                                                                                                                                                                                                                                                                                                                                                                                                                                                          |
| 8116   | sigE-check-F           | CAGGGGAGTTGGTACGACAAA                                                                                                                                                                                                                                                                                                                                                                                                                                                                                                          |
| 8117   | sigE-check-R           | ACCCCGCAGATTTTCGACTTT                                                                                                                                                                                                                                                                                                                                                                                                                                                                                                          |
| 8118   | spoIIIC-check-F        | TGCCTGCAACTTGGACTGAT                                                                                                                                                                                                                                                                                                                                                                                                                                                                                                           |
| 8119   | spoIIIC-check-R        | AGCTTTTAGAACGTCGCGCT                                                                                                                                                                                                                                                                                                                                                                                                                                                                                                           |
| 8122   | spoIVCB-check-F        | ACAGGCCTGCCATCCATTTT                                                                                                                                                                                                                                                                                                                                                                                                                                                                                                           |
| 8123   | spoIVCB-check-R        | GGCCGCAAGCGTCTTTTAAC                                                                                                                                                                                                                                                                                                                                                                                                                                                                                                           |
| 8132   | PspoVG42-up-F          | ATCGCTAGAAATAAGAAAAGTGATTTCTGGGAGA                                                                                                                                                                                                                                                                                                                                                                                                                                                                                             |
| 8133   | PspoVG42-up-R          | TCCTGCTGTTTTTAAAAATTTTTTAAAAAATAGGATATAGTTACACAATTAGGT                                                                                                                                                                                                                                                                                                                                                                                                                                                                         |
| 8134   | PspoVG42-down-F        | ACTATATCCTATTTTTTAAAAAATTTTTTAAAAACGAGCAGGA                                                                                                                                                                                                                                                                                                                                                                                                                                                                                    |
| 8135   | PspoVG42-down-R        | ATCGCTGCAGTCCCTATATAAAAGCATTAGTGTATCA                                                                                                                                                                                                                                                                                                                                                                                                                                                                                          |
| DR194  | SigM operon Fwd        | GGAAAAGGTGGTGAACACTACTAGCCGATTCTGGAGGCTTC                                                                                                                                                                                                                                                                                                                                                                                                                                                                                      |
| DR197  | SigM auto rev          | CTATGTTATACTTTTATAAGAAAGGTTTAAAGTTGCAC                                                                                                                                                                                                                                                                                                                                                                                                                                                                                         |
| DR196  | sigM auto Fwd          | TTTCTTATGAAAGTATAACATAGAGGG                                                                                                                                                                                                                                                                                                                                                                                                                                                                                                    |
| DR198  | sigM rev               | CATGGCCTGCCCGGTTATTACTGGTTCGCTCATTTCCTCA<br>TGTAGAGAAAACCGGTGCTCAATGTATACGGTTCGGTCTTACAGGGCCAACCAAGGAAATCCAGCGCATGCTGAAAAATAAATCTGTAATAATCAGCGA<br>ATGTCGGAGAAAGTGGAACTTTGGAATGGGGATCAGGCCAAGGACCGGGAAAGCGGACAAAGGCCCTGATTACAAAAGATGACGATGACAAAGGCGAGGT<br>GGAATATGGAATAGTAAGAGATTATAAAGATGATGATGATAAAGGCTCAGGCCAAGGACCTGGATCAGGCCAAGGCCCTATGGAACCTGTTAGAATT<br>TTTAAAGAACACAAATGTTTCGGCTGGATCTGTCGGGACAGCGGTTCTGCCCTGCTGTTGCTGAATTTGGCCATTATCAGCAACGTCACGTTTTTAT<br>CCTATCAAATGCTTCCGTTCCGCTAGGCTGCCGTTCCGTTCCGGCTGTTGAACTCTT |

gBlock sequence for C-FLAG-yhdL N-FLAG-yhdK

**Figure S1. Growth and SigM activity in the absence of each anti-sigM factor**

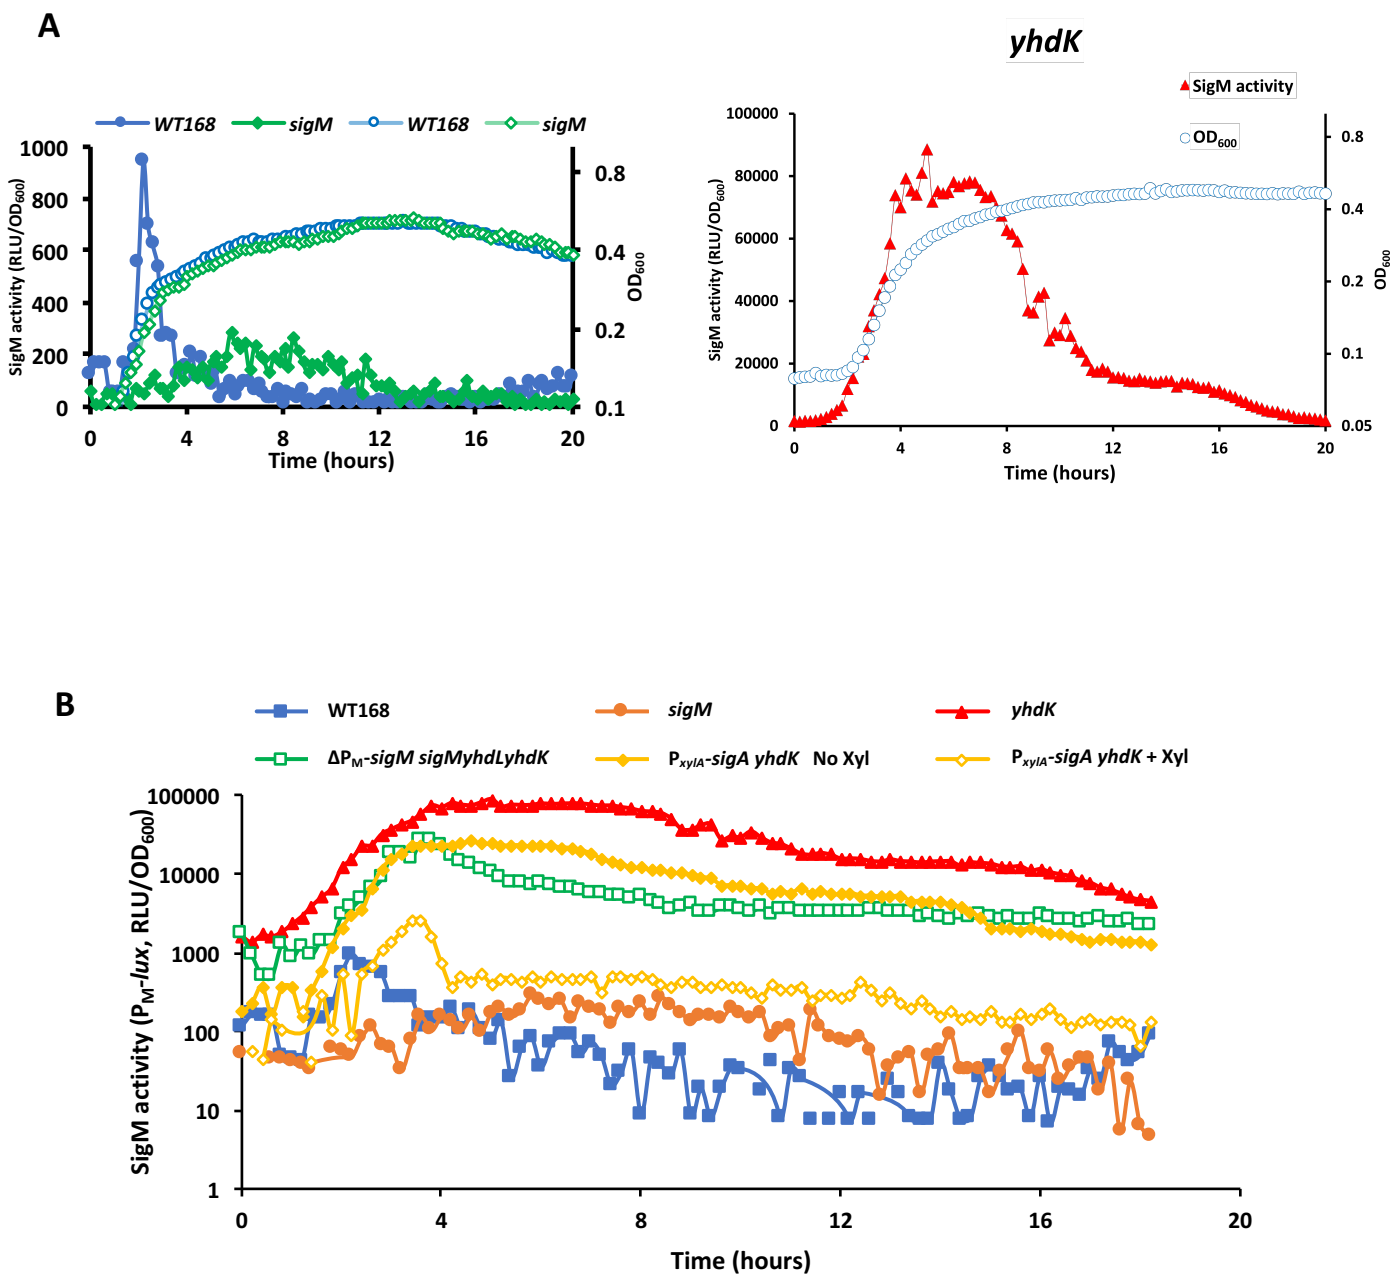

A. [Left panel] SigM activity of WT (168) strain (HB17325) and the *sigM* null mutant (HB17494) during growth in LB medium at 37°C as measured using a  $P_M$ -*lux* reporter (promoter activity is in closed symbols and was calculated by dividing relative light unit (RLU) by  $OD_{600}$ , in open symbols, with measurements every 12 min). [Right panel] SigM activity of the *yhdK* null mutant during growth in LB medium. Note that  $OD_{600}$  was measured with a culture volume of 100  $\mu$ l per well in a 96-well plate.

B. SigM activity of different strains as measured in panel A. A representative measurement is shown.

Figure S1. Growth and SigM activity in the absence of each anti-sigM factor

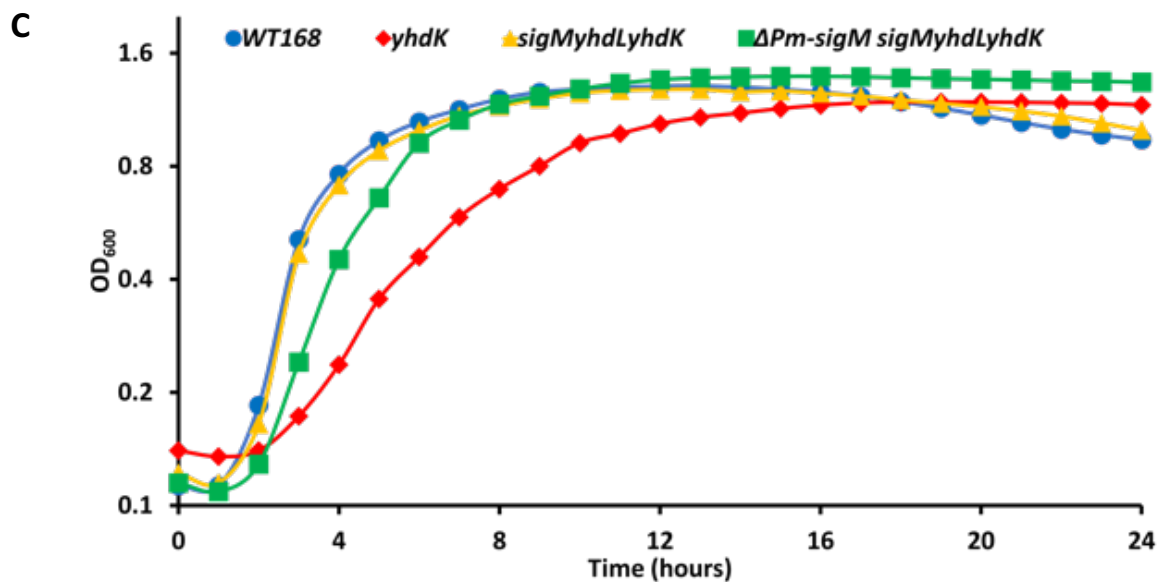

D

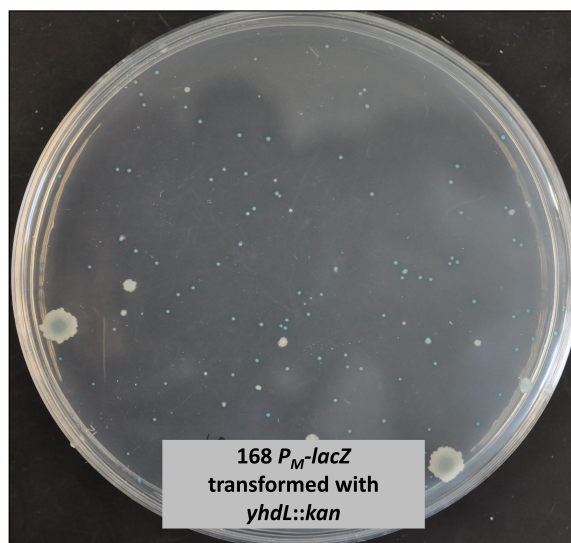

C. Representative growth curve of WT and mutants in liquid LB medium. OD<sub>600</sub> was measured with a culture volume of 200  $\mu$ l per well in a Bioscreen plate, so final OD<sub>600</sub> values are twice those shown in Figure S1A and correspond roughly to those normally detected using a 1 cm path length in a spectrophotometer.

D. Transformation plate using WT 168 strain with a  $P_M$ -lacZ reporter as recipient, and chromosomal DNA of a *yhdL* deletion strain (HB17264) as donor. Transformed cells were plated on a LB plate containing kanamycin and X-gal and incubated at 37° C for 48 hours



**Figure S2. Effect of *rpoB/C* mutations on cell growth, antibiotic sensitivity, morphology and alternative sigma factor activity.**

**A**

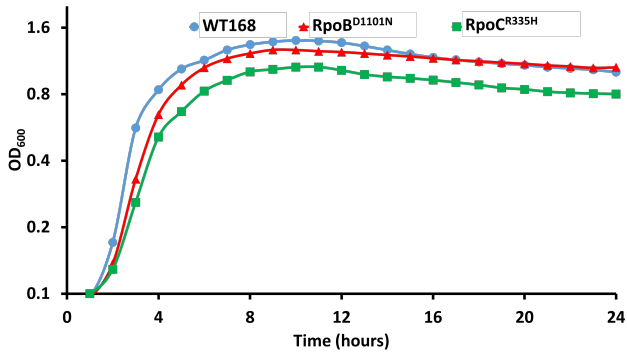

**B**

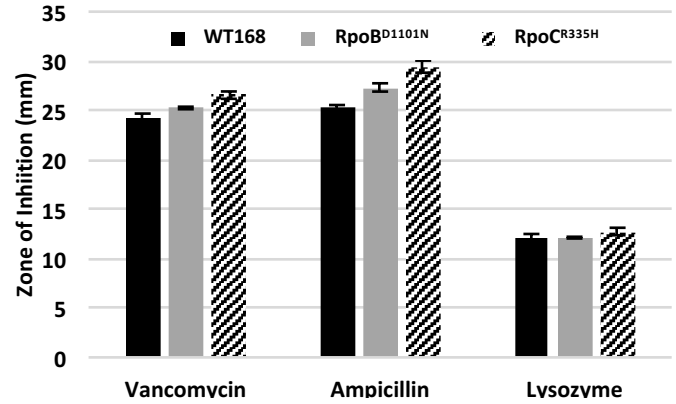

**C**

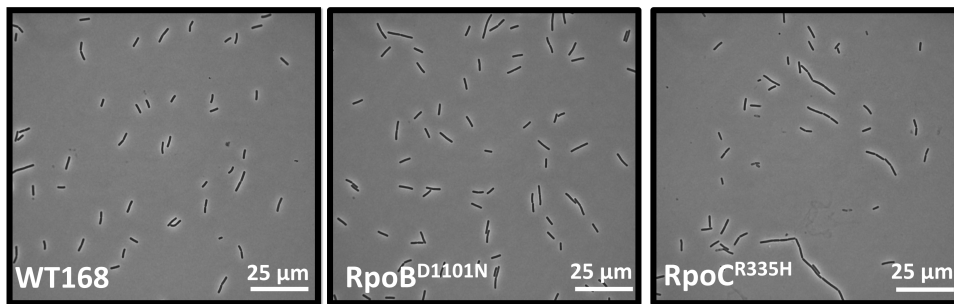

A. Growth curve of WT and *rpoB/C* mutants in LB medium at 37 °C in Bioscreen.

B. Zone of inhibition assay showing sensitivity of WT and *rpoB/C* mutants against vancomycin, ampicillin, and lysozyme. Data was presented as mean ± SEM, n=3.

C. Representative phase contrast microscopic images of WT and mutants grown in LB medium at exponential phase.

Figure S2. Effect of *rpoB/C* mutations on cell growth, antibiotic sensitivity, morphology and alternative sigma factor activity.

D

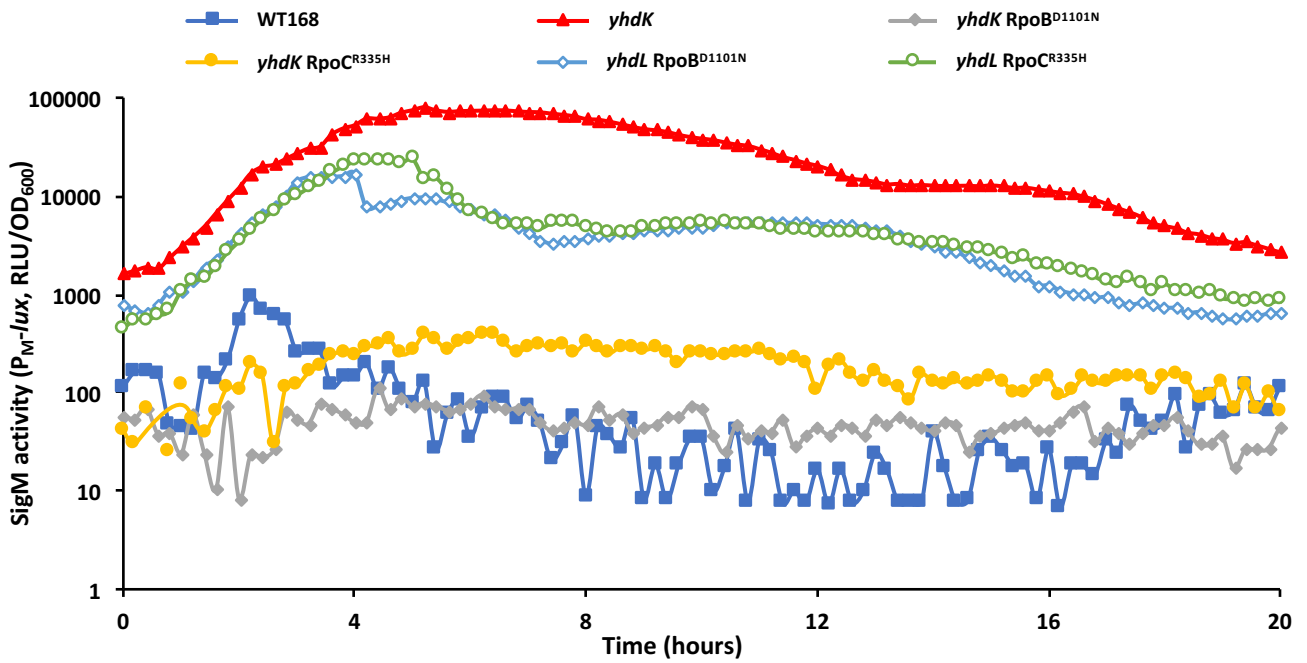

E

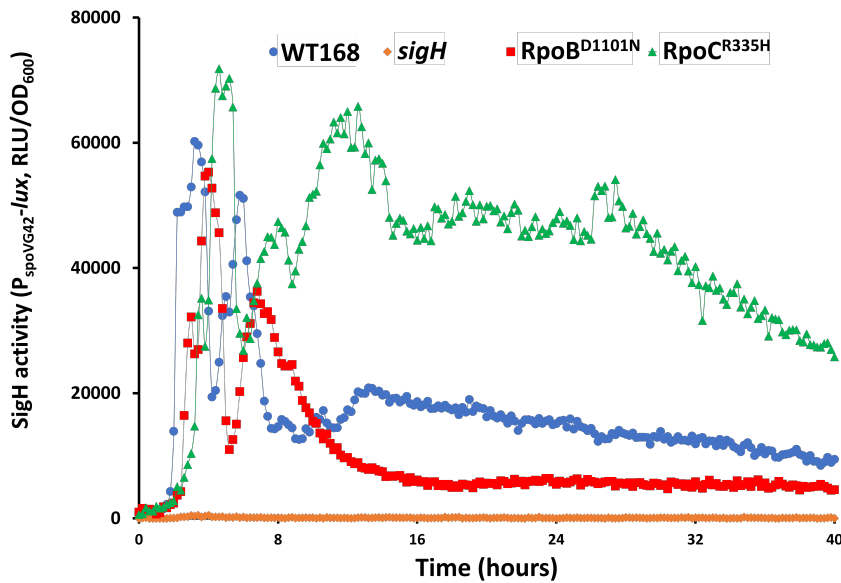

D. SigM activity of *yhdK* and *yhdL* mutants with or without single amino acid substitution in RpoB or RpoC.

E. SigH activity of WT168 strain and mutants during growth in LB medium. SigH activity was measured using a  $P_{spoVG42-lux}$  reporter, with relative light unit (RLU) and OD<sub>600</sub> measured every 12 minutes. The promoter activity is calculated by dividing RLU with OD<sub>600</sub>.

Figure S3. C-FLAG-YhdL and N-FLAG-YhdK exhibit function similar to WT

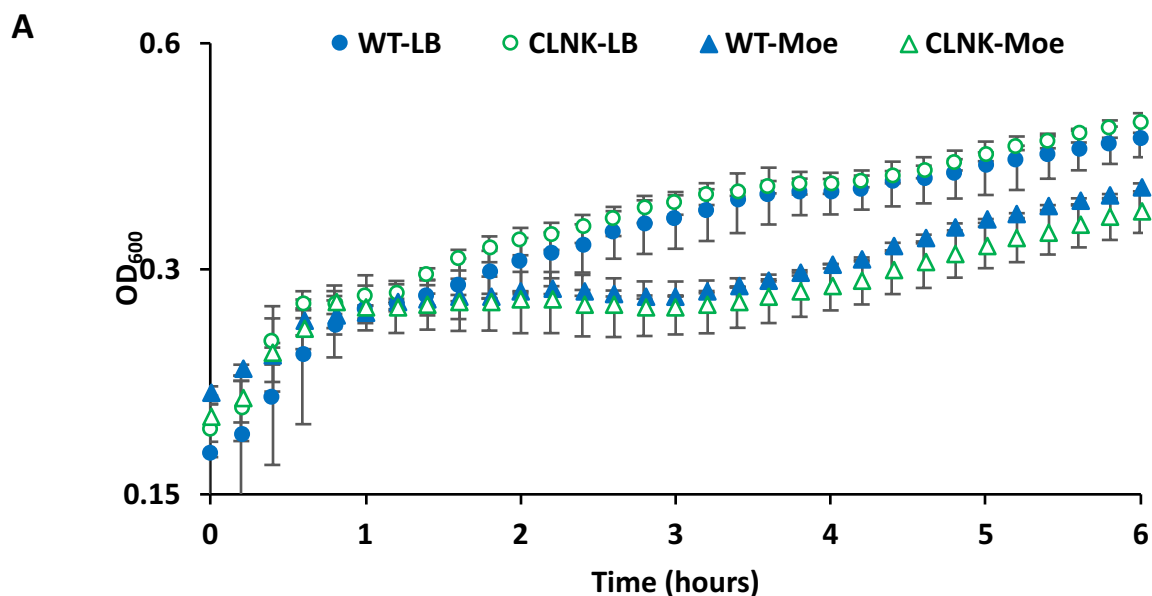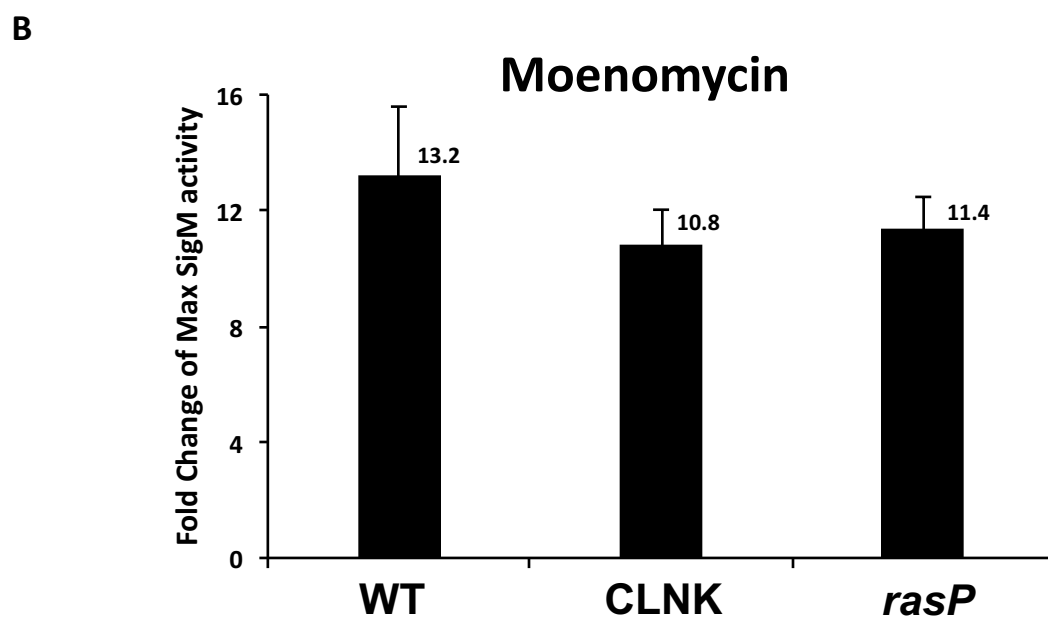

A. Curves of OD<sub>600</sub> of WT and epitope tag labelled C-FLAG-YhdL N-FLAG-YhdK (CLNK) in LB or LB supplemented with 10  $\mu\text{g ml}^{-1}$  moenomycin. Measurement was performed every 6 minutes and every other measurement was shown for simplicity. Data was presented as mean  $\pm$  SD, n=3.

B. Fold change of maximum SigM activity of different strains after treatment of final concentration of 10  $\mu\text{g ml}^{-1}$  moenomycin. SigM activity was measured every 6 minutes after treatment using the P<sub>M</sub>-*lux* reporter and the maximum value was used to calculate fold changes between samples with or without treatment.
